# Supplementary material for: PLEKHM2 Loss of Function Impairs the Activity of iPSC-Derived Neurons via Regulation of Autophagic Flux
Source: MDPI journal article supplement (doi:10.3390/ijms232416092), 2022-12-17
Supplement: s1 [file s1]

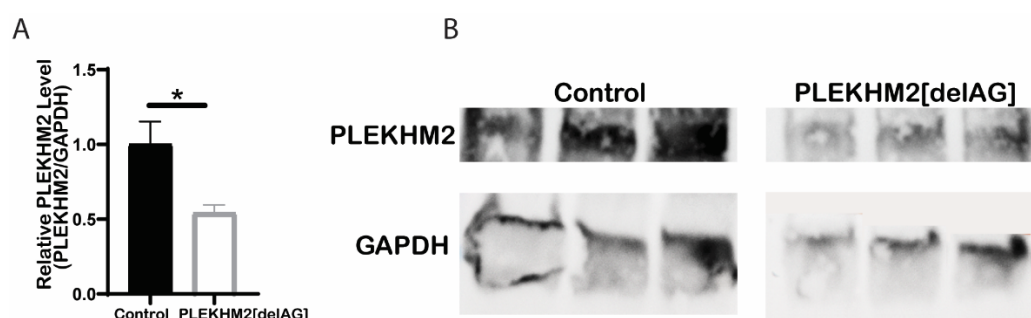

**Supplementary Figure S1.** PLEKHM2 expression in neuroepithelial (NEP) cultures. **A**, Western blot analysis. **B**, Representative western blot membranes of control and PLEKHM2[delAG]. Two tailed student's T-test was used \*  $p < 0.05$ , presenting mean  $\pm$  SEM, control  $n=5$ , PLEKHM2[delAG]  $n=4$ .

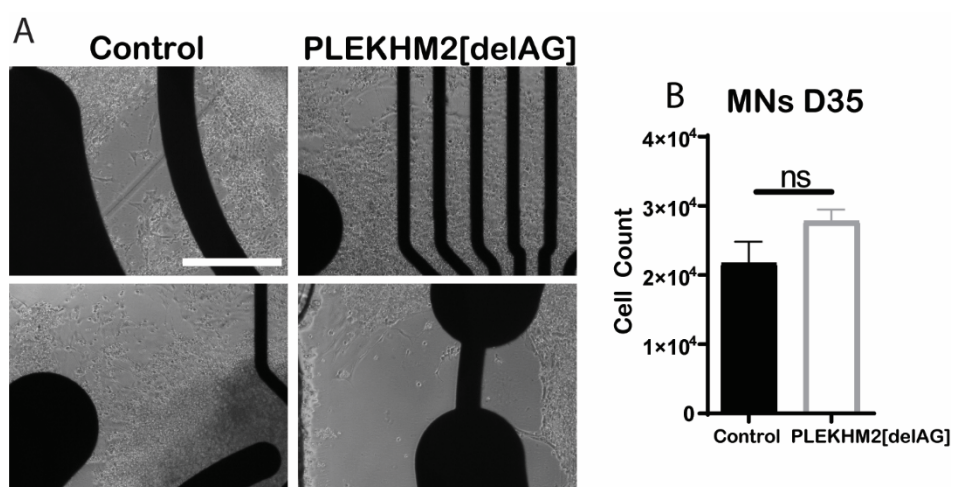

**Supplementary Figure S2.** Estimation of cell number at the end point of the experiment, observing MEA cultured cell populations **A** Representative images of MEA cultures at the end point, D35 before performing a flow cytometry assay. Cell density did not significantly vary between cultures. Scale bar - 400 $\mu$ m **B** Cell numbers within the gate in flow cytometry analysis. Two-tailed student's t-test was employed  $p = 0.1139$ , presenting mean  $\pm$  SEM  $n=6$ .
